# Supplementary material for: Coinfection and Interference Phenomena Are the Results of Multiple Thermodynamic Competitive Interactions
Source: MDPI journal article supplement (doi:10.3390/microorganisms9102060), 2021-09-29
Supplement: s1 [file s1]

# Coinfection and interference phenomena are the results of multiple thermodynamic competitive interactions

Marko Popovic\* and Mirjana Minceva

Biothermodynamics, TUM School of Life Sciences, Technical University of Munich,  
Maximus-von-Imhof-Forum 2, 85354, Freising, Germany

\* Correspondence: author: marko.popovic@tum.de

Growth reactions summarize formation of live matter from a substrate [von Stockar, 2010, 2013a, 2013b]. Table S1 lists the stoichiometric coefficients for growth reactions of the viruses considered in this research. The stoichiometric coefficients are for the growth reaction of the form

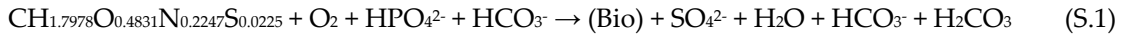

where  $\text{CH}_{1.7978}\text{O}_{0.4831}\text{N}_{0.2247}\text{S}_{0.0225}$  represents amino acids (equation S.1 is the main-text equation 11). (Bio) stands for live matter empirical formula of the form  $\text{CH}_{nH}\text{O}_{nO}\text{N}_{nN}\text{P}_{nP}\text{S}_{nS}$ , with coefficients from main-text Table 2.  $\text{HCO}_3^-$  appears on both sides, because  $\text{HCO}_3^-/\text{H}_2\text{CO}_3$  forms a buffer that regulates the pH. Thus,  $\text{HCO}_3^-$  is formed or used depending on the number of  $\text{H}^+$  ions released by the other reaction participants.

Table S2 gives thermodynamic properties of formation and growth of the viruses considered in this research. Standard molar enthalpy,  $\Delta_r H^0$ , and entropy,  $\Delta_r S^0$ , of growth were calculated using the equations

$$\Delta_r H^0 = \sum_{\text{products}} \nu \Delta_f H^0 - \sum_{\text{reactants}} \nu \Delta_f H^0 \quad (\text{S.2})$$

$$\Delta_r S^0 = \sum_{\text{products}} \nu S_m^0 - \sum_{\text{reactants}} \nu S_m^0 \quad (\text{S.3})$$

where  $\Delta_f H^0$  is standard enthalpy of formation,  $S_m^0$  standard molar entropy and  $\nu$  stoichiometric coefficient from Table S1 [Atkins and de Paula, 2014, 2011]. The summations are over all reactants and products of the growth reaction (S.1). The uncertainties in  $\Delta_r H^0$  and  $\Delta_r S^0$  were found by error propagation, starting from uncertainties in  $\Delta_f H^0$  and  $S_m^0$ .

Table S.3 lists elemental compositions and molar masses of the major molecular constituents of viruses: RNA, DNA, proteins, carbohydrates and lipids. The values were taken from [Popovic and Minceva, 2020a]. This data was combined with molecular composition of viruses, using main-text equation 3, to find the elemental compositions of viruses.

Table S.4 gives chemical formulas and standard thermodynamic properties of the growth medium components. These properties were combined with thermodynamic properties of viruses [ $\Delta_f H^0(\text{Bio})$ ,  $S_m^0(\text{Bio})$  and  $\Delta_f G^0(\text{Bio})$  from Table S2] and stoichiometry of growth (Table S1) to find thermodynamic properties of virus growth ( $\Delta_r H^0$ ,  $\Delta_r S^0$  and  $\Delta_r G^0$ ), using equations S.2, S.3 and main-text equation 12. The results are given in Table S2 and main-text Table 3.

## References

- Atkins, P. and de Paula, J. (2014). *Physical Chemistry: Thermodynamics, Structure, and Change*, 10<sup>th</sup> ed., New York: W.H. Freeman and Company.
- Atkins, P. and de Paula, J. (2011). *Physical Chemistry for the Life Sciences*, 2<sup>nd</sup> ed., New York: W.H. Freeman and Company.
- Popovic, M., & Minceva, M. (2020a). A thermodynamic insight into viral infections: do viruses in a lytic cycle hijack cell metabolism due to their low Gibbs energy?. *Heliyon*, 6(5), e03933. <https://doi.org/10.1016/j.heliyon.2020.e03933>
- Vieillard, P. and Tardy, Y. (1984). Thermochemical properties of phosphates. In: *Phosphate Minerals*, Nriagu, J.O., Moore, P.B., eds., Berlin: Springer-Verlag, pp. 171-198.
- Von Stockar, U. (2010). Biothermodynamics of live cells: a tool for biotechnology and biochemical engineering. *Journal of Non-Equilibrium Thermodynamics*, 35(4), 415-475. <https://doi.org/10.1515/jnetdy.2010.024>.
- Von Stockar, U. (2013a). Live cells as open non-equilibrium systems. In: *Biothermodynamics: The Role of Thermodynamics in Biochemical Engineering*, Urs von Stockar, ed., Lausanne: EPFL Press, pp. 399-421. <https://doi.org/10.1201/b15428-23>
- Von Stockar, U. (2013b). Biothermodynamics of live cells: Energy dissipation and heat generation in cellular cultures. In *Biothermodynamics: The Role of Thermodynamics in Biochemical Engineering*, Urs von Stockar, ed., Lausanne: EPFL Press, pp. 475-534. <https://doi.org/10.1201/b15428-26>

**Table S1.** Stoichiometries of growth of viruses. The stoichiometric coefficients are for the growth reaction  $\text{CH}_{1.7978}\text{O}_{0.4831}\text{N}_{0.2247}\text{S}_{0.0225} + \text{O}_2 + \text{HPO}_4^{2-} + \text{HCO}_3^- \rightarrow (\text{Bio}) + \text{SO}_4^{2-} + \text{H}_2\text{O} + \text{HCO}_3^- + \text{H}_2\text{CO}_3$ , where  $\text{CH}_{1.7978}\text{O}_{0.4831}\text{N}_{0.2247}\text{S}_{0.0225}$  represents amino acids. (Bio) stands for live matter empirical formula of the form  $\text{CH}_n\text{H}_n\text{O}_n\text{N}_n\text{P}_n\text{S}_n$ , with coefficients from main-text Table 2. The viruses marked with an asterisk are enveloped viruses. For enveloped viruses, lipids were not included into calculation, since they are taken from the host cell during budding and not synthesized at the ribosomes [Popovic and Minceva, 2020b].

| Name                                          | Composition reference        | Reactants  |                |                                |                               | → | Products |                               |                  |                               |                                |
|-----------------------------------------------|------------------------------|------------|----------------|--------------------------------|-------------------------------|---|----------|-------------------------------|------------------|-------------------------------|--------------------------------|
|                                               |                              | Amino acid | O <sub>2</sub> | HPO <sub>4</sub> <sup>2-</sup> | HCO <sub>3</sub> <sup>-</sup> |   | Bio      | SO <sub>4</sub> <sup>2-</sup> | H <sub>2</sub> O | HCO <sub>3</sub> <sup>-</sup> | H <sub>2</sub> CO <sub>3</sub> |
| Adenovirus                                    | [Riedel et al., 2019]        | 1.25226    | 0.31707        | 0.00997                        | 0.02531                       | → | 1.00000  | 0.02263                       | 0.09639          | 0.00000                       | 0.27757                        |
| Adenovirus                                    | [Knight, 1975]               | 1.25226    | 0.31707        | 0.00997                        | 0.02531                       | → | 1.00000  | 0.02263                       | 0.09639          | 0.00000                       | 0.27757                        |
| Coliphages T2, T4, T6                         | [Knight, 1975]               | 1.38163    | 0.52576        | 0.04868                        | 0.00000                       | → | 1.00000  | 0.02812                       | 0.18563          | 0.04112                       | 0.34051                        |
| Enterovirus                                   | [Riedel et al., 2019]        | 1.32815    | 0.44323        | 0.02308                        | 0.00401                       | → | 1.00000  | 0.02508                       | 0.12772          | 0.00000                       | 0.33216                        |
| Equine encephalomyelitis*                     | [Knight, 1975]               | 1.23801    | 0.30097        | 0.00619                        | 0.03177                       | → | 1.00000  | 0.02207                       | 0.08735          | 0.00000                       | 0.26979                        |
| Fowl plague*                                  | [Knight, 1975]               | 1.15326    | 0.20071        | 0.00189                        | 0.03668                       | → | 1.00000  | 0.02023                       | 0.07336          | 0.00000                       | 0.18995                        |
| Herpes simplex*                               | [Knight, 1975]               | 1.22296    | 0.28459        | 0.00887                        | 0.02631                       | → | 1.00000  | 0.02203                       | 0.09231          | 0.00000                       | 0.24927                        |
| Influenza*                                    | [Riedel et al., 2019]        | 1.13477    | 0.17813        | 0.00071                        | 0.03820                       | → | 1.00000  | 0.01981                       | 0.06980          | 0.00000                       | 0.17297                        |
| Influenza*                                    | [Knight, 1975]               | 1.14355    | 0.18724        | 0.00071                        | 0.03850                       | → | 1.00000  | 0.01996                       | 0.07034          | 0.00000                       | 0.18205                        |
| Orthomyxoviruses*                             | [Riedel et al., 2019]        | 1.14036    | 0.18443        | 0.00088                        | 0.03808                       | → | 1.00000  | 0.01992                       | 0.07050          | 0.00000                       | 0.17844                        |
| Paramyxoviruses*                              | [Riedel et al., 2019]        | 1.14036    | 0.18443        | 0.00088                        | 0.03808                       | → | 1.00000  | 0.01992                       | 0.07050          | 0.00000                       | 0.17844                        |
| Picornaviruses                                | [Riedel et al., 2019]        | 1.32815    | 0.44323        | 0.02308                        | 0.00401                       | → | 1.00000  | 0.02508                       | 0.12772          | 0.00000                       | 0.33216                        |
| Poliovirus                                    | [Riedel et al., 2019]        | 1.32815    | 0.44323        | 0.02308                        | 0.00401                       | → | 1.00000  | 0.02508                       | 0.12772          | 0.00000                       | 0.33216                        |
| Poxviruses*                                   | [Riedel et al., 2019]        | 1.21641    | 0.26534        | 0.00241                        | 0.03793                       | → | 1.00000  | 0.02137                       | 0.07832          | 0.00000                       | 0.25434                        |
| Reoviruses, Rotaviruses, and<br>Caliciviruses | [Riedel et al., 2019]        | 1.26324    | 0.34079        | 0.01091                        | 0.02400                       | → | 1.00000  | 0.02291                       | 0.09865          | 0.00000                       | 0.28724                        |
| Rhabdoviruses*                                | [Riedel et al., 2019]        | 1.18779    | 0.24214        | 0.00384                        | 0.03432                       | → | 1.00000  | 0.02100                       | 0.07947          | 0.00000                       | 0.22211                        |
| Rhinovirus                                    | [Riedel et al., 2019]        | 1.32815    | 0.44323        | 0.02308                        | 0.00401                       | → | 1.00000  | 0.02508                       | 0.12772          | 0.00000                       | 0.33216                        |
| SARS-CoV-2*                                   | [Popovic and Minceva, 2020b] | 1.29093    | 0.36323        | 0.00381                        | 0.04072                       | → | 1.00000  | 0.02417                       | 0.06809          | 0.00000                       | 0.33165                        |
| Simian virus 5*                               | [Knight, 1975]               | 1.14036    | 0.18443        | 0.00088                        | 0.03808                       | → | 1.00000  | 0.01992                       | 0.07050          | 0.00000                       | 0.17844                        |

**Table S2:** Thermodynamic properties of formation and Growth of viruses. Symbols:  $\Delta_f H^0(\text{Bio})$  - standard enthalpy of formation of live matter;  $S_m^0(\text{Bio})$  - standard molar entropy of live matter;  $\Delta_f G^0(\text{Bio})$  – standard Gibbs energy of formation of live matter;  $\Delta_r H^0$  - enthalpy of growth;  $\Delta_r S^0$  - entropy of growth;  $\Delta_r G^0$  - Gibbs energy of growth

| Name                                       | Composition reference        | $\Delta_f H^0(\text{bio})$<br>(kJ/C-mol) |   |    | $S_m^0(\text{bio})$<br>(J/C-mol K) |   |     | $\Delta_f G^0(\text{bio})$<br>(kJ/C-mol) |   |    | $\Delta_r H^0$<br>(kJ/C-mol) |   |    | $\Delta_r S^0$<br>(J/C-mol K) |   |     | $\Delta_r G^0$<br>(kJ/C-mol) |   |    |
|--------------------------------------------|------------------------------|------------------------------------------|---|----|------------------------------------|---|-----|------------------------------------------|---|----|------------------------------|---|----|-------------------------------|---|-----|------------------------------|---|----|
| Adenovirus                                 | [Riedel et al., 2019]        | -73                                      | ± | 29 | 31.4                               | ± | 6.2 | -32                                      | ± | 30 | -150                         | ± | 42 | -22.4                         | ± | 9.5 | -144                         | ± | 43 |
| Adenovirus                                 | [Knight, 1975]               | -73                                      | ± | 29 | 31.4                               | ± | 6.2 | -32                                      | ± | 30 | -150                         | ± | 42 | -22.4                         | ± | 9.5 | -144                         | ± | 43 |
| Coliphages T2, T4, T6                      | [Knight, 1975]               | -108                                     | ± | 28 | 33.6                               | ± | 6.6 | -65                                      | ± | 28 | -242                         | ± | 41 | -43.9                         | ± | 9.8 | -230                         | ± | 43 |
| Enterovirus                                | [Riedel et al., 2019]        | -90                                      | ± | 29 | 32.7                               | ± | 6.4 | -48                                      | ± | 29 | -207                         | ± | 41 | -35.5                         | ± | 9.6 | -197                         | ± | 43 |
| Equine encephalomyelitis*                  | [Knight, 1975]               | -72                                      | ± | 29 | 31.5                               | ± | 6.2 | -32                                      | ± | 30 | -143                         | ± | 42 | -21.2                         | ± | 9.5 | -137                         | ± | 43 |
| Fowl plague*                               | [Knight, 1975]               | -76                                      | ± | 29 | 31.8                               | ± | 6.3 | -35                                      | ± | 29 | -97                          | ± | 42 | -13.6                         | ± | 9.5 | -93                          | ± | 43 |
| Herpes simplex*                            | [Knight, 1975]               | -75                                      | ± | 29 | 31.6                               | ± | 6.2 | -34                                      | ± | 29 | -135                         | ± | 42 | -20.1                         | ± | 9.5 | -129                         | ± | 43 |
| Influenza*                                 | [Riedel et al., 2019]        | -77                                      | ± | 29 | 31.9                               | ± | 6.3 | -36                                      | ± | 29 | -87                          | ± | 42 | -11.8                         | ± | 9.5 | -83                          | ± | 43 |
| Influenza*                                 | [Knight, 1975]               | -76                                      | ± | 29 | 31.8                               | ± | 6.3 | -34                                      | ± | 29 | -91                          | ± | 42 | -12.3                         | ± | 9.5 | -87                          | ± | 43 |
| Orthomyxoviruses*                          | [Riedel et al., 2019]        | -76                                      | ± | 29 | 31.9                               | ± | 6.3 | -35                                      | ± | 29 | -90                          | ± | 42 | -12.2                         | ± | 9.5 | -86                          | ± | 43 |
| Paramyxoviruses*                           | [Riedel et al., 2019]        | -76                                      | ± | 29 | 31.9                               | ± | 6.3 | -35                                      | ± | 29 | -90                          | ± | 42 | -12.2                         | ± | 9.5 | -86                          | ± | 43 |
| Picornaviruses                             | [Riedel et al., 2019]        | -90                                      | ± | 29 | 32.7                               | ± | 6.4 | -48                                      | ± | 29 | -207                         | ± | 41 | -35.5                         | ± | 9.6 | -197                         | ± | 43 |
| Poliovirus                                 | [Riedel et al., 2019]        | -90                                      | ± | 29 | 32.7                               | ± | 6.4 | -48                                      | ± | 29 | -207                         | ± | 41 | -35.5                         | ± | 9.6 | -197                         | ± | 43 |
| Poxviruses*                                | [Riedel et al., 2019]        | -67                                      | ± | 30 | 31.1                               | ± | 6.1 | -27                                      | ± | 30 | -127                         | ± | 42 | -17.5                         | ± | 9.4 | -122                         | ± | 43 |
| Reoviruses, Rotaviruses, and Caliciviruses | [Riedel et al., 2019]        | -77                                      | ± | 29 | 31.8                               | ± | 6.3 | -36                                      | ± | 29 | -161                         | ± | 42 | -25.2                         | ± | 9.5 | -154                         | ± | 43 |
| Rhabdoviruses*                             | [Riedel et al., 2019]        | -75                                      | ± | 29 | 31.7                               | ± | 6.2 | -34                                      | ± | 29 | -116                         | ± | 42 | -16.8                         | ± | 9.5 | -111                         | ± | 43 |
| Rhinovirus                                 | [Riedel et al., 2019]        | -90                                      | ± | 29 | 32.7                               | ± | 6.4 | -48                                      | ± | 29 | -207                         | ± | 41 | -35.5                         | ± | 9.6 | -197                         | ± | 43 |
| SARS-CoV-2*                                | [Popovic and Minceva, 2020b] | -71                                      | ± | 30 | 31.7                               | ± | 6.2 | -30                                      | ± | 30 | -173                         | ± | 42 | -26.2                         | ± | 9.5 | -165                         | ± | 43 |
| Simian virus 5*                            | [Knight, 1975]               | -76                                      | ± | 29 | 31.9                               | ± | 6.3 | -35                                      | ± | 29 | -90                          | ± | 42 | -12.2                         | ± | 9.5 | -86                          | ± | 43 |

**Table S3:** Elemental composition of major classes of molecules constituting viruses. Elemental composition is given in the form of empirical formulas:  $\text{CH}_{n_H}\text{O}_{n_O}\text{N}_{n_N}\text{P}_{n_P}\text{S}_{n_S}$ . Since the empirical formulas are per C-mole,  $n_C = 1$ . Data taken from [Popovic and Minceva, 2020a].

| Class        | $n_H$   | $n_O$   | $n_N$   | $n_P$   | $n_S$   | Mr (g/C-mol) |
|--------------|---------|---------|---------|---------|---------|--------------|
| RNA          | 1.23160 | 0.76101 | 0.39670 | 0.10500 | 0.00000 | 34.216       |
| DNA          | 1.25548 | 0.58400 | 0.37961 | 0.10219 | 0.00000 | 31.082       |
| Protein      | 1.56922 | 0.30849 | 0.27079 | 0.00000 | 0.00611 | 22.492       |
| Carbohydrate | 2.00000 | 1.00000 | 0.00000 | 0.00000 | 0.00000 | 30.000       |
| Lipid        | 1.92157 | 0.11765 | 0.00000 | 0.00000 | 0.00000 | 15.804       |

**Table S4:** Elemental composition and thermodynamic properties of the virus growth medium. Standard thermodynamic properties of the mixture of amino acids were estimated from its elemental composition using the Battley equation.  $\Delta_f H^\circ$  - standard enthalpy of formation;  $S^\circ_m$  standard molar entropy;  $\Delta_f G^\circ$  - standard Gibbs energy of formation.

| Name              | Formula                                     | $\Delta_f H^\circ$ (kJ/mol) | $S^\circ_m$ (J/mol K) | $\Delta_f G^\circ$ (kJ/mol) | Reference                   |
|-------------------|---------------------------------------------|-----------------------------|-----------------------|-----------------------------|-----------------------------|
| Amino acid        | $CH_{1.7978}O_{0.4831}N_{0.2247}S_{0.0225}$ | -107±30                     | 36±7                  | -60±30                      | Battley equation            |
| Oxygen            | $O_2$ (g)                                   | 0                           | 205.138               | 0                           | [Atkins and de Paula, 2014] |
| Hydrogenphosphate | $HPO_4^{2-}$ (aq)                           | -1292.14                    | 8.4                   | -1089.26                    | [Vieillard and Tardy, 1984] |
| Bicarbonate       | $HCO_3^-$ (aq)                              | -691.99                     | 91.2                  | -586.77                     | [Atkins and de Paula, 2014] |
| Sulfate           | $SO_4^{2-}$ (aq)                            | -909.27                     | 20.1                  | -744.53                     | [Atkins and de Paula, 2014] |
| Water             | $H_2O$ (l)                                  | -285.83                     | 69.91                 | -237.13                     | [Atkins and de Paula, 2014] |
| Carbonic acid     | $H_2CO_3$ (aq)                              | -699.65                     | 187.4                 | -623.08                     | [Atkins and de Paula, 2014] |
